# Supplementary material
Source: PubMed Central journal article supplement (PMC5737170)
Supplement: ba000810-suppl1.pdf [file ba000810-suppl1.pdf]

Supplementary Table 1:

a)

| UPN     | Age | Sex | WCC (x10 <sup>9</sup> /L) | Disease phase |
|---------|-----|-----|---------------------------|---------------|
| CML264  | 61  | M   | NK                        | Chronic       |
| CML194  | 40  | F   | 150                       | Chronic       |
| CML109  | 56  | F   | NK                        | Chronic       |
| CML259  | NK  | NK  | NK                        | Chronic       |
| CML110  | 46  | F   | NK                        | Chronic       |
| CML111  | 35  | F   | NK                        | Chronic       |
| CML373  | 42  | F   | 382                       | Chronic       |
| CML339  | 26  | F   | 295                       | Chronic       |
| CML294  | 38  | F   | 294                       | Chronic       |
| CML273  | 50  | F   | 308                       | Chronic       |
| CML340  | NK  | NK  | NK                        | Chronic       |
| CML341  | 48  | M   | 231                       | Chronic       |
| CML332  | 54  | F   | 132                       | Chronic       |
| CML343  | 39  | M   | 48                        | Chronic       |
| CML347  | 27  | F   | 386                       | Chronic       |
| CML112  | 32  | M   | >100                      | Accelerated   |
| CML185  | 46  | M   | >100                      | Accelerated   |
| CML239  | 62  | M   | NK                        | Accelerated   |
| CML415  | 71  | F   | 135                       | Accelerated   |
| CML001  | NK  | F   | NK                        | Myeloid Blast |
| CML002  | 65  | M   | NK                        | Myeloid Blast |
| CML371  | 40  | M   | 51                        | Myeloid Blast |
| COL091  | 78  | M   | NK                        | Myeloid Blast |
| COL091R | 78  | M   | NK                        | Myeloid Blast |
| HER002  | 65  | F   | NK                        | Myeloid Blast |
| LIV1723 | 36  | F   | NK                        | Myeloid Blast |
| LIV1724 | 33  | M   | NK                        | Myeloid Blast |
| LIV2616 | 43  | F   | NK                        | Myeloid Blast |
| LIV2225 | 65  | F   | NK                        | Myeloid Blast |
| LIV2397 | 42  | M   | NK                        | Myeloid Blast |

b)

| Patient | Karyotype                                                                                                       |
|---------|-----------------------------------------------------------------------------------------------------------------|
| COL091  | 46, XY t(9;22) (q34;q11), del(16) (q22q23) [8],<br>46, XY t(9;22) (q34;q11), del(16) (q22q23), i(17) (?q10) [2] |
| COL091R | 46, XY t(9;22) (q34;q11), del(16) (q22), i(17) (q10) [4]                                                        |
| CML371  | 46, XY t(9;22) (q34;q11) [39] /46, idem, del(7)(p11)[5]/46, XY [6]                                              |
| CML002  | 46, XY, t(9;22) (q34;q11)[15]<br>46, idem, del(17)(p13) [15]                                                    |

Supplementary Table 1: a) Patients characteristics, b) Detailed cytogenetic analysis for the indicated patients obtained at diagnosis of BP-CML.

## **Models of leukemic cell haemopoiesis in Myeloid BP-CML and AML.**

Left, representation of the normal hemopoietic hierarchy. HSC, hemopoietic stem cell; MPP, multi-potent progenitor; LMPP, lymphoid-primed multi-potential progenitor; CMP; common myeloid progenitor; GMP, granulocyte-macrophage progenitor; MEP, megakaryocyte-erythroid progenitor. Right, models of hemopoiesis in CD34+ progenitor AML where LMPP-like and GMP-like progenitors have been described<sup>1</sup>; myeloid BP-CML (described here) and CD34- precursor AML<sup>2</sup>. Pre-L HSC, pre-leukemic stem cells: CML-CP-SC, CML chronic phase stem cell; LSC, leukemic stem cells.

## **References**

1. Goardon N, Marchi E, Atzberger A, et al. Coexistence of LMPP-like and GMP-like leukemia stem cells in acute myeloid leukemia. *Cancer Cell*. 2011;19(1):138-152.
2. Quek L, Otto GW, Garnett C, et al. Genetically distinct leukemic stem cells in human CD34- acute myeloid leukemia are arrested at a hemopoietic precursor-like stage. *Journal of Experimental Medicine*. 2016;Jul 4. pii: jem.20151775. [Epub ahead of print].
